# Supplementary material
Source: PubMed Central journal article supplement (PMC3392489)

# Supplemental Figure 1

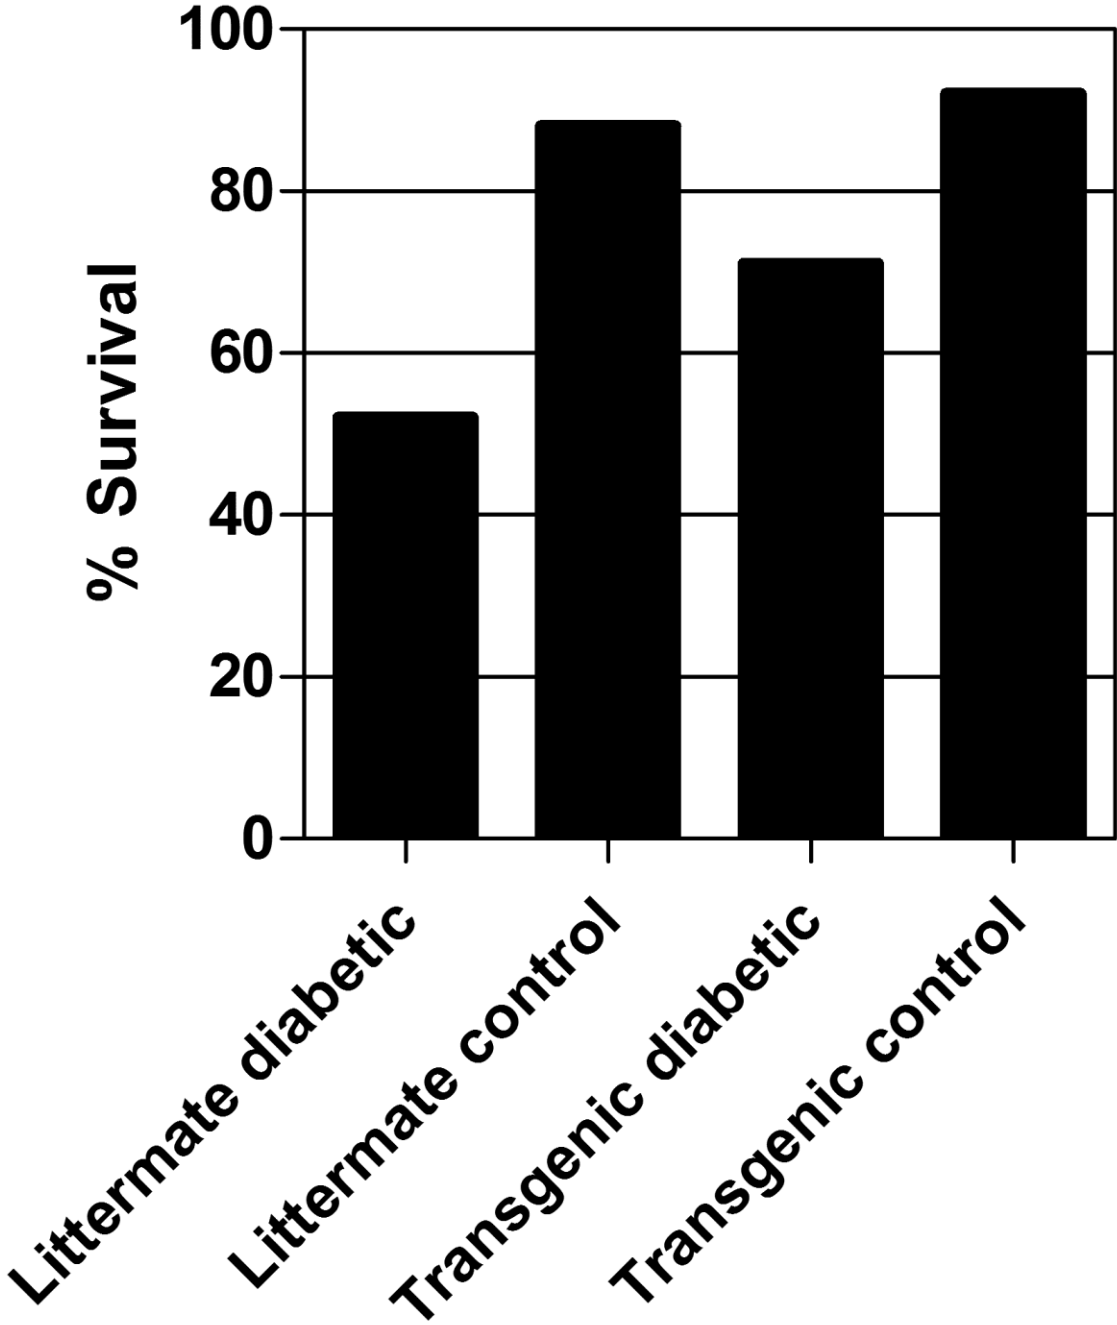

Supplement: NIHMS382961-supplement-Supplemental_Figure_1.pdf [file NIHMS382961-supplement-Supplemental_Figure_1.pdf]

# Supplemental Figure 2

## Mechanical Sensation at 3 and 6 months (By Sex)

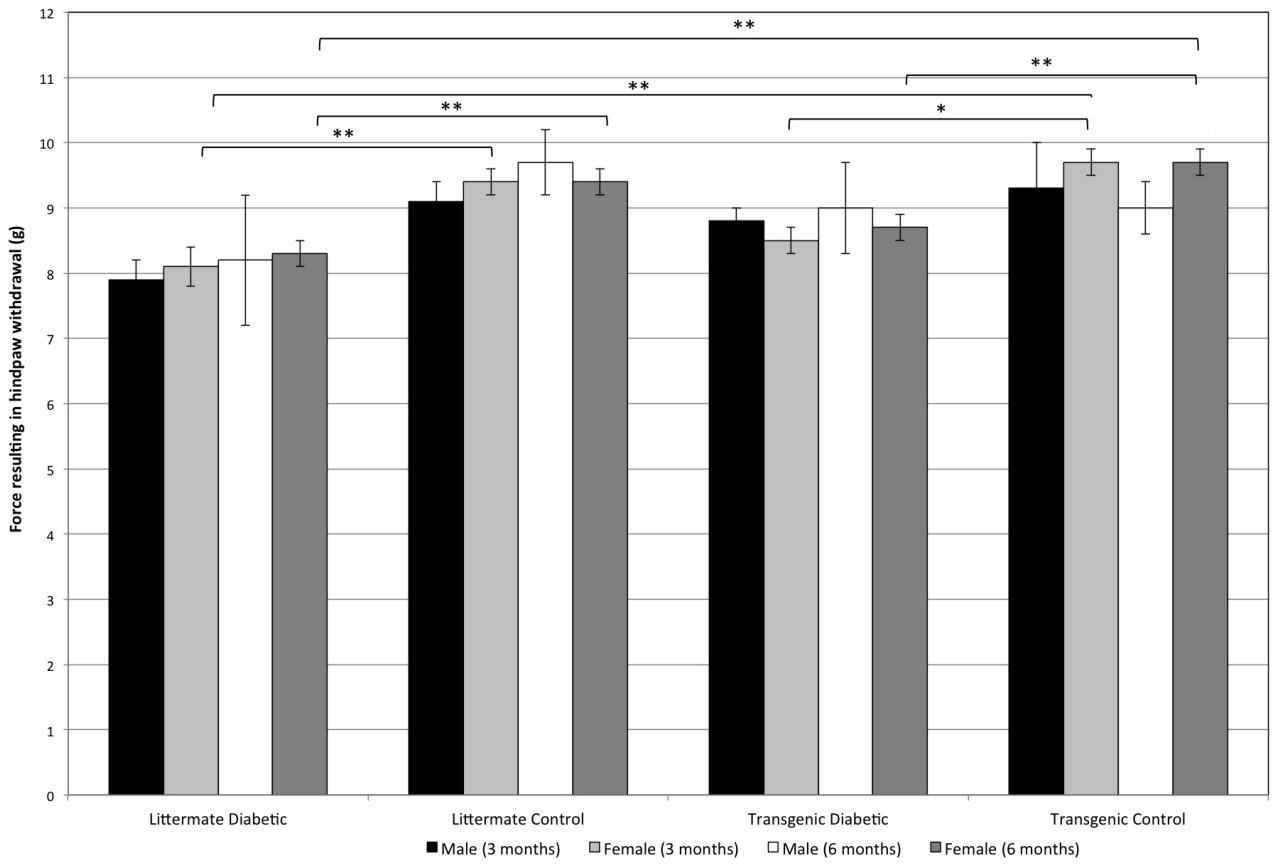

Supplement: NIHMS382961-supplement-Supplemental_Figure_2.pdf [file NIHMS382961-supplement-Supplemental_Figure_2.pdf]
